# Supplementary material for: Biochemical studies of the multicopper oxidase (small laccase) from Streptomyces coelicolor using bioactive phytochemicals and site-directed mutagenesis
Source: PubMed Central journal article supplement (PMC3918160; doi:10.1111/1751-7915.12068), 2013-07-01
Supplement: mbt0006-0588-sd1.pdf [file mbt0006-0588-sd1.pdf]

## **SUPPLEMENTAL FIGURE LEGENDS**

**Supplemental Figure 1. Absorption spectrum of purified SLAC.** (A) The absorption spectrum of purified and concentrated SLAC (30 mg mL<sup>-1</sup>; in 50 mM HEPES-K, pH 7.5, 0.5 M NaCl, 0.25 M imidazole, 5% glycerol) was recorded on a Varian Cary 50 spectrophotometer at room temperature. The wavelengths for the major peak and two shoulders are shown on the graph. (B) Corresponding image of the purified and concentrated SLAC preparation.

**Supplemental Figure 2. Effect of temperature on SLAC activity.** Reactions (200 µL) contained 3.7 µg of SLAC, 1 mM ABTS, and 50 mM sodium acetate (pH 4.0). n = 3; errors indicate standard deviation.

**Supplemental Figure 3. pH Stability of SLAC.** SLAC was pre-incubated for up to 5 h at room temperature in 50 mM universal buffer solutions (50 mM acetic acid, 50 mM boric acid, 50 mM phosphoric acid) ranging from pH 4.0 to 10.0. Reaction mixtures contained 1.2 µg SLAC, 1 mM ABTS, and were performed at 60 °C for 20 min. n = 3; errors indicate standard deviation.

**Supplemental Figure 4. Chemical structures of natural bioactive phenolic substrates.**

Structures are shown for p-coumaric acid, caffeic acid, ferulic acid, apigenin and kaempferol.

**Supplemental Figure 5. Multiple sequence alignment of SLAC and other small multicopper oxidases.** The secondary structure of SLAC was assigned by DSSP and is shown above the

alignment. Similar residues are shadowed, and identical residues are boxed. SLAC residues that were mutated to Ala are indicated by filled arrows and numbered above the alignment. The proteins and the accession numbers are SLAC *Streptomyces coelicolor* copper oxidase (Q9XAL8), *Streptomyces griseus* EpoA (Q93HV5), *Saccharomonospora viridis* multicopper oxidase (C7MW31), *Nitrosomonas europaea* multicopper oxidase (Q82UE7), and *Clostridium beijerinckii* multicopper oxidase (A6LXP0).

**Supplemental Figure 6. Michaelis Menten plots for SLAC mutant S292A on quercetin and myricetin.** Enzyme activity corresponding to initial reaction rates was calculated for (A) quercetin and (B) myricetin at substrate concentrations up to the limit of substrate solubility. Reactions contained 6  $\mu\text{g mL}^{-1}$  SLAC mutant S292A. Michaelis-Menten curves were plotted using GraphPad Prism5 Software.

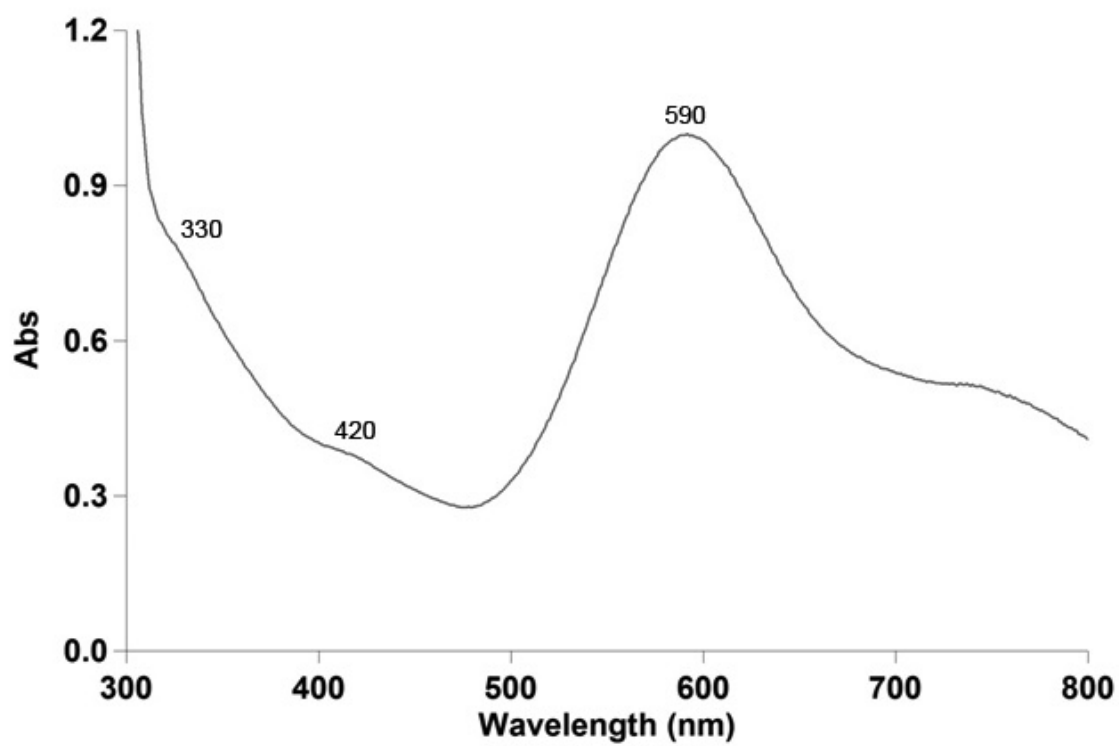

(A)

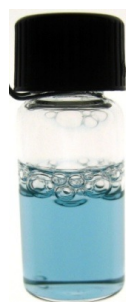

(B)

Supplemental Figure 1

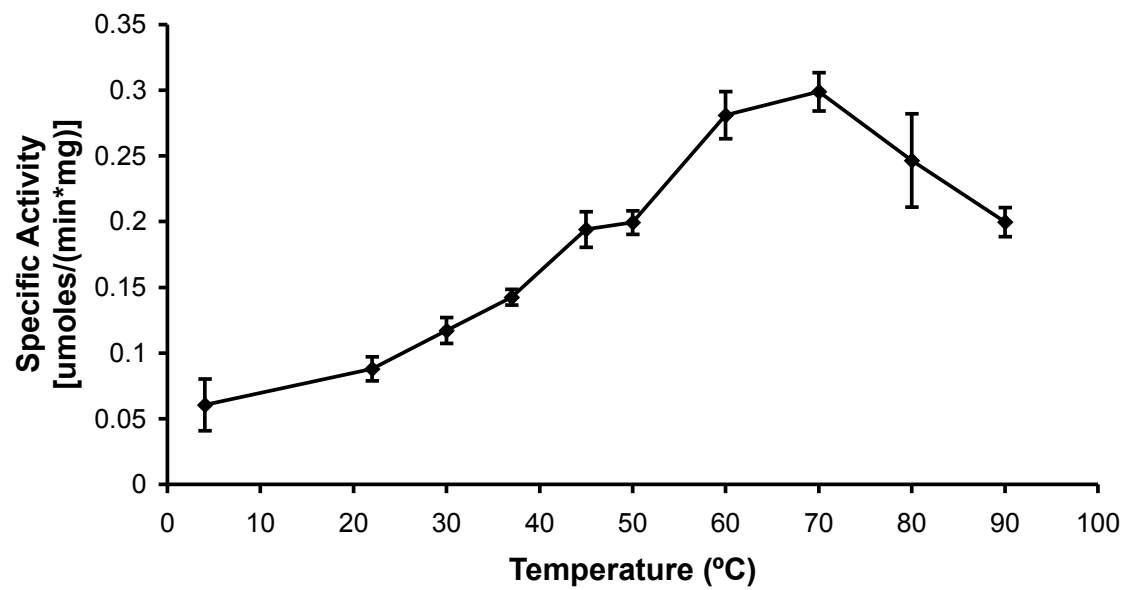

Supplemental Figure 2

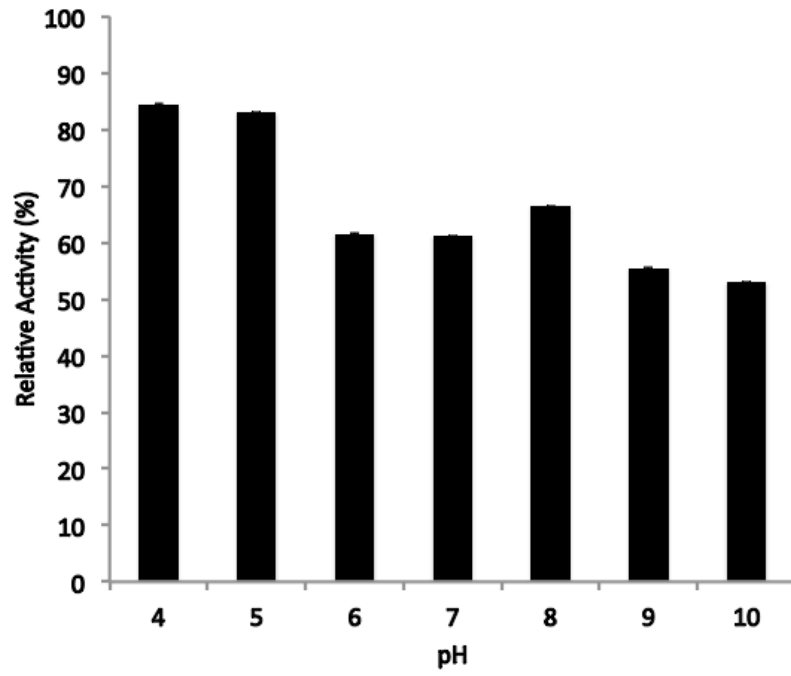

Supplemental Figure 3

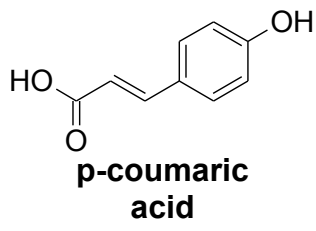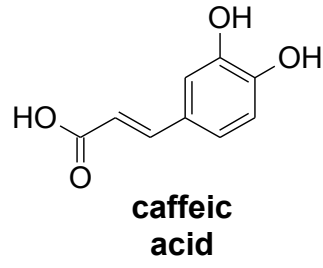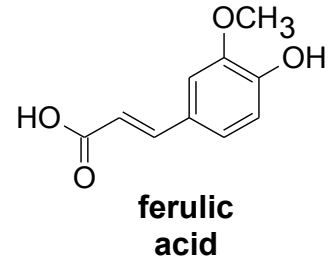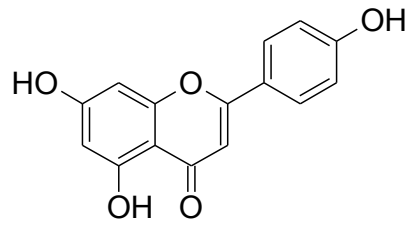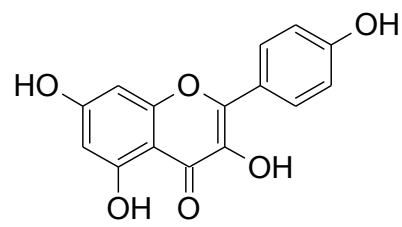

**Supplemental Figure 4**

|                        |                                                                     |    |
|------------------------|---------------------------------------------------------------------|----|
| SCO6712_laccase_Q9XAL8 | - - - - - MDRRGFNRR VLLGGAAAATSLSI APEVAGAAPA AKGI TARTAPAGGEVR     | 49 |
| EpoA_oxidase_Q93HV5    | - - - - - MDRRTFSRR MLVGGAAAATGVTLSLSLGAVEASS AENPPRTAPAGGVVR       | 49 |
| Svir_oxidase_C7MW31    | - MI RKYARTGAFGK KVSRRS MLVGAAGMAAPVVASTVGGTTATAAPN - - RAGDSQGEIR  | 57 |
| NITEU_oxidase_Q82UE7   | MHTRRRNNNPF LYSCLTLFLI LIFLSLSSSLAQAGKVREYWI AAETK DWNYAPTGANQIDL A | 60 |
| Cbei_oxidase_A6LXP0    | - - - - - MIITPDI QTLKFKMCKGVKYFELFA EQVEQEILPG - - - -             | 35 |

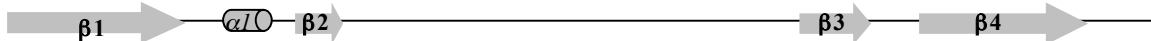

|                        |                                                                         |     |
|------------------------|-------------------------------------------------------------------------|-----|
| SCO6712_laccase_Q9XAL8 | - HLKMYAEK LADGQMGYG - FEK GKASVP - - - - - GPLI EVNEGDT LHI EFTNTMDV   | 97  |
| EpoA_oxidase_Q93HV5    | - RLKMYAEK LPNGELGYG - FEK GKASIP - - - - - GPLI ELNEGDT VHI EFKNLTDV   | 97  |
| Svir_oxidase_C7MW31    | - RITMYAEELPGGMI GYG - LEP GKATVP - - - - - GPVLEMWEGDT LEI ELVNTDHD    | 105 |
| NITEU_oxidase_Q82UE7   | SDLGVWGT LTYTKRYI GYTDGSYSHPL PQPEWMLG LPTI RAAVGD TI KI HFLNKTD M      | 120 |
| Cbei_oxidase_A6LXP0    | - - - - - VFIKGGWGN - - - - - GSI P - - - - - GPTIQVYP GDFVNI RRVFNKLPE | 70  |

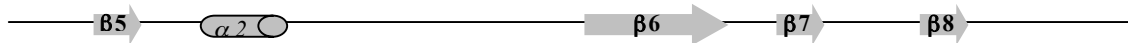

|                        |                                                                       |     |
|------------------------|-----------------------------------------------------------------------|-----|
| SCO6712_laccase_Q9XAL8 | RASLHVHGLDYEI SSDGTAMNKS - - DVEPGGTRTYT WRTHKPGRRDDGTWRP - - - - -   | 147 |
| EpoA_oxidase_Q93HV5    | DASLHVHGVVDYDI ANDGTRMKS - - HVEPGGTRTYT WRTHAPGRRKDGTYP - - - - -    | 147 |
| Svir_oxidase_C7MW31    | RLSLIHPHGV EYDTE SDGSPLNDS - - FNNPGERRTYI WRSRAPYQAKDGTWRP - - - - - | 155 |
| NITEU_oxidase_Q82UE7   | PLSMHPHGV MYDKDNEGADGGKGG - SIPPGERYTYT WI VDQDAGP GP GDP - - - - -   | 169 |
| Cbei_oxidase_A6LXP0    | S TSVVHWHGLNVPNDMDGVP AVEPSPEI SPGDYFDYRFKI TNPPGTHMYHAHVNVVKQDMM     | 130 |

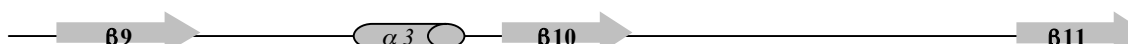

|                        |                                                                      |     |
|------------------------|----------------------------------------------------------------------|-----|
| SCO6712_laccase_Q9XAL8 | GSAGYWHYHDHVVGTEHGTGGI RNLGYGPVI VRRKGDVLP DAT - - - - - HTIVF       | 195 |
| EpoA_oxidase_Q93HV5    | GSAGYWHYHDHVVGTDHGTGGI RKGLYGPVVVRRKGDILP DQT - - - - - CTVVF        | 195 |
| Svir_oxidase_C7MW31    | GSAGYWHYHDHAMGTDHGTGGVLRGLYGLV VRRPGLIP DRQ - - - - - YTIVF          | 203 |
| NITEU_oxidase_Q82UE7   | - SSI VWLYHS HVMAEEVN - - - LGLI GLII TAAGKAYS DKNPAPRDVDQEFIALYMI F | 224 |
| Cbei_oxidase_A6LXP0    | GLLGGFVILNPNKTKV NKDYLLMQEWHLVGL KKGEEV RPDII YKLDP - - - - - FTNDF  | 182 |

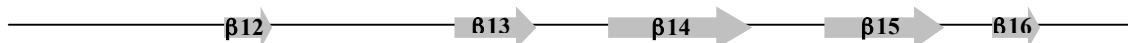

|                        |                                                                       |     |
|------------------------|-----------------------------------------------------------------------|-----|
| SCO6712_laccase_Q9XAL8 | N - - - - - DMTI NNRKPHTGPDFEATVGGDRVEI VMI THGEYHTFHM HGH RWADNRTG   | 246 |
| EpoA_oxidase_Q93HV5    | N - - - - - DMMI NNRKTAHNSVNF EATVGGDRLEFVMI THGEFYHTFHI HGH RWADNRTG | 246 |
| Svir_oxidase_C7MW31    | N - - - - - GMTI NNRVAPDAPI FEARLGERVEFI AIGHGDHFHTFHL HAHRWADNRTG    | 254 |
| NITEU_oxidase_Q82UE7   | NEENDEESGLKHAINGRI FGNLSGFETR RQRVRWHLVALGNEVDNHTVHWH - - - GQTV      | 280 |
| Cbei_oxidase_A6LXP0    | N - - - - - MFTI NGKSF PATTPMPI EYGDTVRLRLGAI QI NHPMHI HGH QFKVENAD  | 233 |

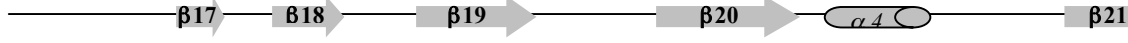

|                        |                                                                              |     |
|------------------------|------------------------------------------------------------------------------|-----|
| SCO6712_laccase_Q9XAL8 | I LTGPDDPSRVI DNKITGPA DSFGFQII AAGEGVGAGAWMYHCHVQS HSDM - - - GMVGLF        | 302 |
| EpoA_oxidase_Q93HV5    | I LTGPDDPSRVI GQDRLRPRDSYGLQII AGERVGA GAWMYHCHVQS HSDM - - - GMAGLL         | 302 |
| Svir_oxidase_C7MW31    | L LSGPDDPTPI I DNKDLNPGS SFGFQVI AAGEGVGP GAWMYHCHVQFHS DD - - - GMAGIF      | 310 |
| NITEU_oxidase_Q82UE7   | LDHG - - - - RRTDVVEI MPASMTS VDMVPRS - - - PGNWL FHC HVNDHMI A - - - GMATRW | 328 |
| Cbei_oxidase_A6LXP0    | GNPLDKDNMI LKNTI LVASGETWDVIFKANN - - - PGVWPFHCHI SHHMSNNLT KGTGGMF         | 290 |

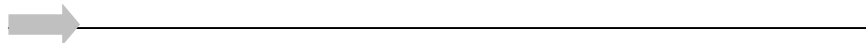

|                        |                                                      |     |
|------------------------|------------------------------------------------------|-----|
| SCO6712_laccase_Q9XAL8 | L VKKPDGTIPGYEPHEHGG - - - - - ATAKSGESGEPTGGAAHEHEH | 348 |
| EpoA_oxidase_Q93HV5    | L I KKADGTIPGYEPHHAAGGTEKKAGAKGAGANADKAAKGAAEHQH     | 348 |
| Svir_oxidase_C7MW31    | L VRNEDGSLP - - - - - PGAEALERYRNHG -                | 334 |
| NITEU_oxidase_Q82UE7   | L VK - - - - -                                       | 331 |
| Cbei_oxidase_A6LXP0    | T TLVYTSNKSS - - - - -                               | 301 |

Supplemental Figure 5

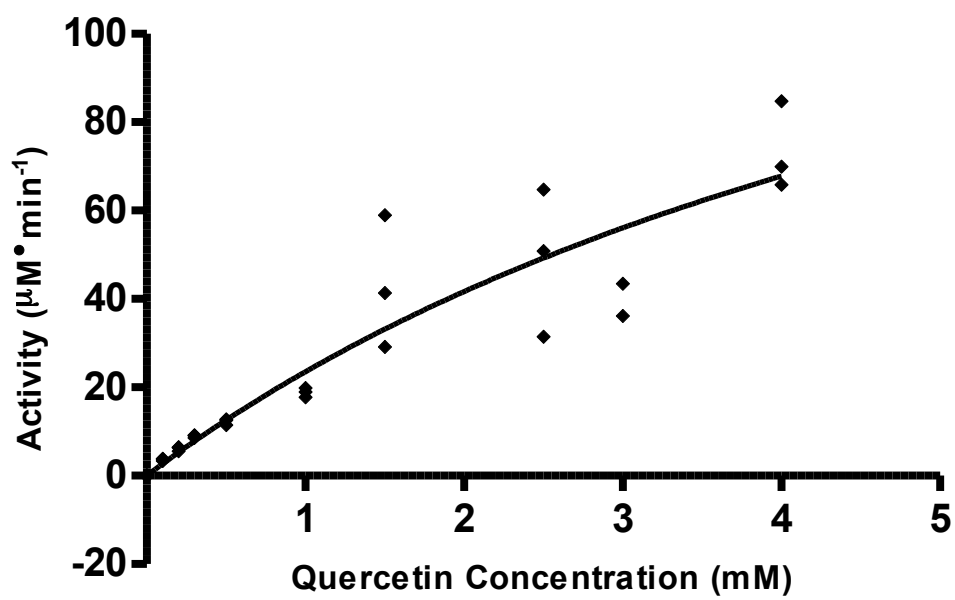

(A)

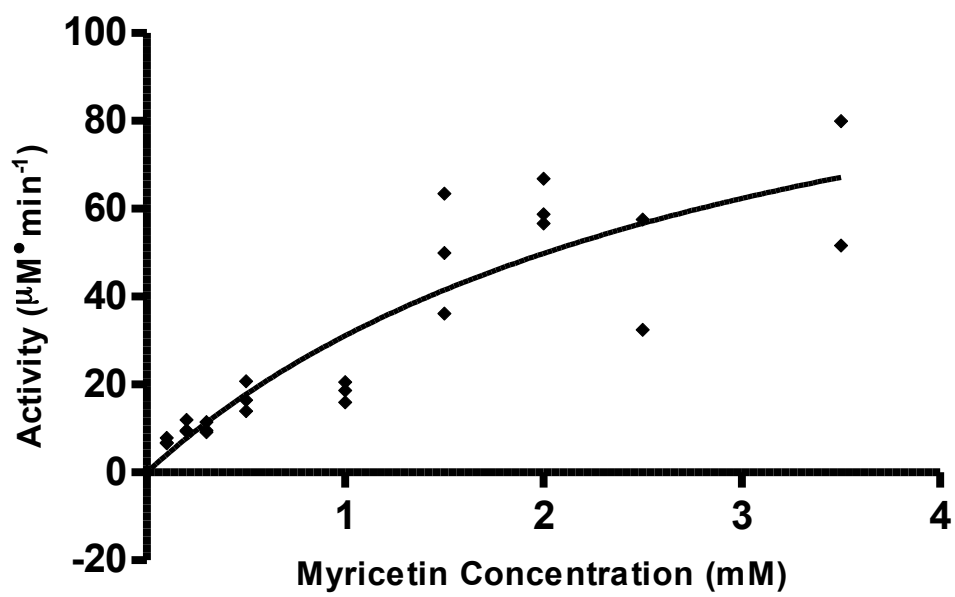

(B)

Supplemental Figure 6
