# Supplementary material for: Biochemical studies of the multicopper oxidase (small laccase) from Streptomyces coelicolor using bioactive phytochemicals and site-directed mutagenesis
Source: PubMed Central journal article supplement (PMC3918160; doi:10.1111/1751-7915.12068), 2013-07-01
Supplement: mbt0006-0588-sd7.pdf [file mbt0006-0588-sd7.pdf]

### Supplemental Table 1. Construction of SLAC mutants

| Residue & mutation | Predicted function of mutated residues | Primers                                                                     |
|--------------------|----------------------------------------|-----------------------------------------------------------------------------|
| H231A              | type 1 Cu binding                      | CACGGGGAGTACTACGCCACCTTCCACATGCAC,<br>GTGCATGTGGAAGGTGGCGTAGTACTCCCCGTG     |
| C288A              | type 1 Cu binding                      | GCGTGGATGTACCACGCCACGTCCAGAGCCAC,<br>GTGGCTCTGGACGTGGGCGTGGTACATCCACGC      |
| H293A              | type 1 Cu binding                      | CTGCCACGTCCAGAGCGCCTCCGACATGGGCATG,<br>CATGCCCATGTTCGGAGGCGCTCTGGACGTGGCAG  |
| M298A              | fine-tuning type 1 Cu redox potential  | CACTCCGACATGGGCGCGGTGGGGCTGTTCTG,<br>CAGGAACAGCCCCACCGCGCCCATGTTCGGAGTG     |
| H104A              | type 3 Cu binding                      | GCCAGCCTGCACGTGGCCGGCCTGGACTACGAG,<br>CTCGTAGTCCAGGCCGGCCACGTGCAGGCTGGC     |
| H156A              | type 3 Cu binding                      | GGCTACTGGCACTACGCCGACCACGTCTCGCC,<br>GGCGACGACGTGGTTCGGCGTAGTGCCAGTAGCC     |
| H289A              | type 3 Cu binding                      | GTGGATGTACCACTGCGCCGTCCAGAGCCACTCC,<br>GGAGTGGCTCTGGACGGCGCAGTGGTACATCCAC   |
| H158A              | type 3 Cu binding                      | CTGGCACTACCACGACGCCGTCTCGGCACCGAAC,<br>GTTCCGGTCCGACGACGGCGTCTGGTGTAGTGCCAG |
| H287A              | type 3 Cu binding                      | GGGGCGTGGATGTACGCCTGCCACGTCCAGAGC,<br>GCTCTGGACGTGGCAGGCGTACATCCACGCCCC     |
| H236A              | type 3 Cu binding                      | CACACCTTCCACATGGCCGGTCACCGCTGGGCG,<br>CGCCCAGCGGTGACCGGCCATGTGGAAGGTGTG     |
| H102A              | type 2 Cu binding                      | CGTGCGGGCCAGCCTGGCCGTGCACGGCCTGGAC,<br>GTCCAGGCCGTGCACGGCCAGGCTGGCCCCGACG   |
| H234A              | type 2 Cu binding                      | GTACTIONCACACCTTCGCCATGCACGGTCACCG,<br>GCGGTGACCGTGCATGGCGAAGGTGTGGTAGTAC   |
| M198A              | Substrate binding                      | GATCGTCTTCAACGACGCGACCATCAACAACCG,<br>GCGGTTGTTGATGGTTCGCGTCGTTGAAGACGATC   |
| E228A              | Substrate binding                      | CATGATCACGCACGGGGCGTACTACCACACCTTC,<br>GAAGGTGTGGTAGTACGCCCCGTGCGTGATCATG   |
| Y229A              | Substrate binding                      | GATCACGCACGGGGAGGCCTACCACACCTTCCAC,<br>GTGGAAGGTGTGGTAGGCCTCCCCGTGCGTGATC   |
| Y230A              | Substrate binding                      | CACGCACGGGGAGTACGCCACACCTTCCACATG,<br>CATGTGGAAGGTGTGGGCGTACTCCCCGTGCGTG    |
| S292A              | Substrate binding                      | CACGTCCAGAGCCACGCCGACATGGGCATGGTG,<br>CACCATGCCCATGTTCGGCGTGGCTCTGGACGTG    |
